# Supplementary material for: Enhanced catalytic activity and stability of SOFC electrodes through plasma-driven surface modification
Source: Royal Society of Chemistry journal article supplement (doi:10.1039/d3ta06111f), 2024-01-01
Supplement: d3ta06111f1.pdf [file d3ta06111f1.pdf]

## Supplementary Information

### Enhanced Catalytic Activity and Stability of SOFC Electrodes through Plasma-driven Surface Modification

Hyunduck Shin, ‡<sup>a</sup> Jongsu Seo, ‡<sup>b</sup> SungHyun Jeon, ‡<sup>a</sup> Seung Jin Jeong, <sup>a</sup> Jinwook Kim, <sup>a</sup> Siwon Lee <sup>c</sup>, Jeong Jin Lee, <sup>a</sup> and WooChul Jung\*<sup>a</sup>

a. Department of Materials Science and Engineering, Korea Advanced Insitute of Science and Technology (KAIST) 291 Daehak-ro, Yuseong-gu, Daejeon, 34141, Republic of Korea

b. Hydrogen Research Department, Korea Institute of Energy Research (KIER), Daejeon 34129, Republic of Korea

c. Department of Materials Science and Engineering, Hanbat National University, Daejeon 34158, Republic of Korea

‡ These authors contributed equally to this work.

\* E-mail: wcjung@kaist.ac.kr (W. Jung).

**Table S1** The area intensity and ratio for X-ray photoelectron spectroscopy (XPS) spectra of Sr  $3d_{5/2}$  and  $3d_{3/2}$ .

| Sample        | Intensity                             |                                       | Area ratio | Intensity                                 |                                           | Area ratio |
|---------------|---------------------------------------|---------------------------------------|------------|-------------------------------------------|-------------------------------------------|------------|
|               | Sr <sub>(lattice)</sub><br>$3d_{5/2}$ | Sr <sub>(lattice)</sub><br>$3d_{3/2}$ |            | Sr <sub>(non-lattice)</sub><br>$3d_{5/2}$ | Sr <sub>(non-lattice)</sub><br>$3d_{3/2}$ |            |
| <b>Bare</b>   | 25864.4                               | 17241.2                               | 3:2        | 31040                                     | 20691.2                                   | 3:2        |
| <b>Plasma</b> | 25966.6                               | 17309.3                               | 3:2        | 18715.1                                   | 12475.5                                   | 3:2        |

**Table S2** The deconvolution analysis areas for each peak.

| Sample        | $O_{\text{lattice}}$ |      | $O_{\text{defect}}$ |      | $O_{\text{surface}}$ |      | $H_2O_{\text{ad}}$ |      | Area ratio           |                     |                                        |
|---------------|----------------------|------|---------------------|------|----------------------|------|--------------------|------|----------------------|---------------------|----------------------------------------|
|               | BE                   | FWHM | BE                  | FWHM | BE                   | FWHM | BE                 | FWHM | $O_{\text{lattice}}$ | $O_{\text{defect}}$ | $O_{\text{defect}}/O_{\text{lattice}}$ |
| <b>Bare</b>   | 528.56               | 1.10 | 529.4               | 2.08 | 531.35               | 1.74 | 533.3              | 1.96 | 72683.8              | 55923.6             | 0.77                                   |
| <b>Plasma</b> | 528.23               | 1.16 | 529.4               | 1.90 | 531.46               | 1.83 | 533.3              | 1.94 | 42516.9              | 47572.9             | 1.12                                   |

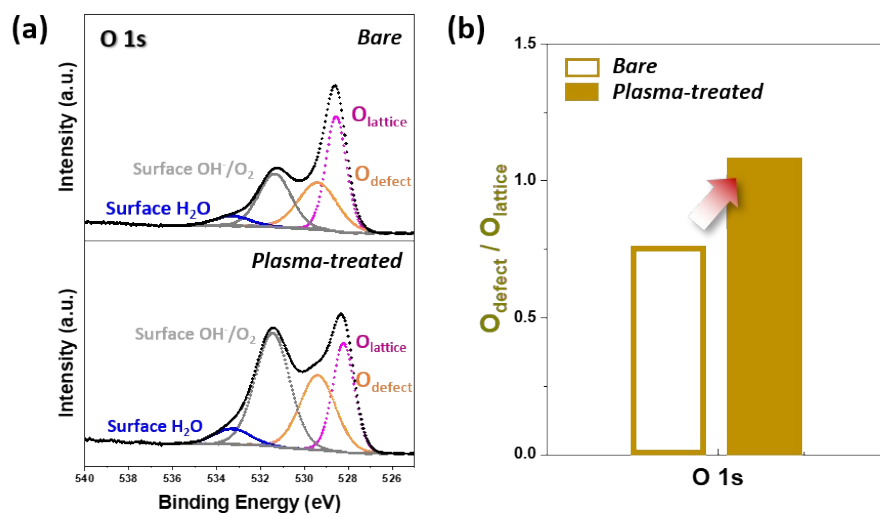

**Fig. S1** X-ray photoelectron spectroscopy (XPS) results of (a) O 1s spectra, and (b) summarized graph of bare and plasma-treated  $\text{La}_{0.6}\text{Sr}_{0.4}\text{Co}_{0.2}\text{Fe}_{0.8}\text{O}_{3-\delta}$  (LSCF) surfaces.

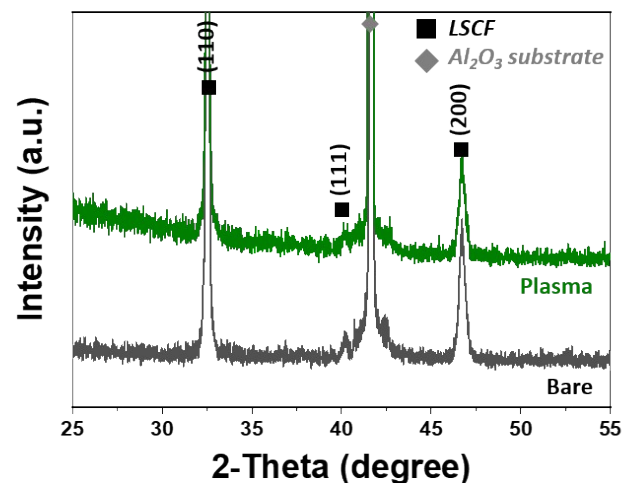

**Fig. S2** X-ray diffraction (XRD) patterns of  $\text{La}_{0.6}\text{Sr}_{0.4}\text{Co}_{0.2}\text{Fe}_{0.8}\text{O}_{3-\delta}$  (LSCF) films with plasma exposure.

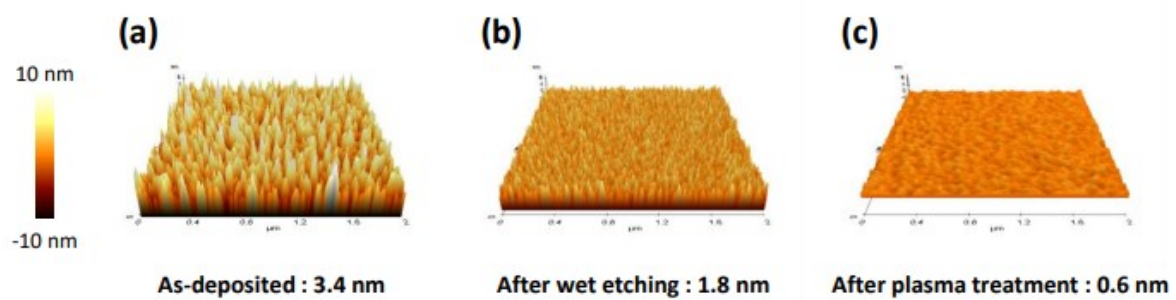

**Fig. S3** Surface morphological changes of (a) as-deposited, (b) bare, and (c) plasma-treated  $\text{La}_{0.6}\text{Sr}_{0.4}\text{Co}_{0.2}\text{Fe}_{0.8}\text{O}_{3-\delta}$  (LSCF) films by atomic force microscopy (AFM).

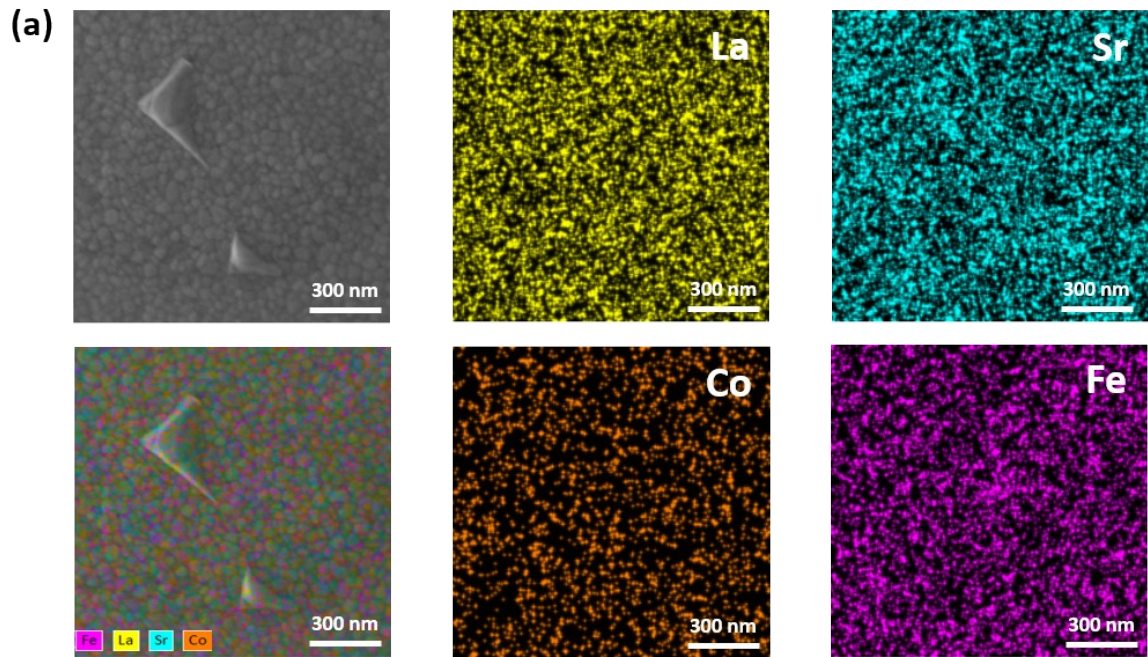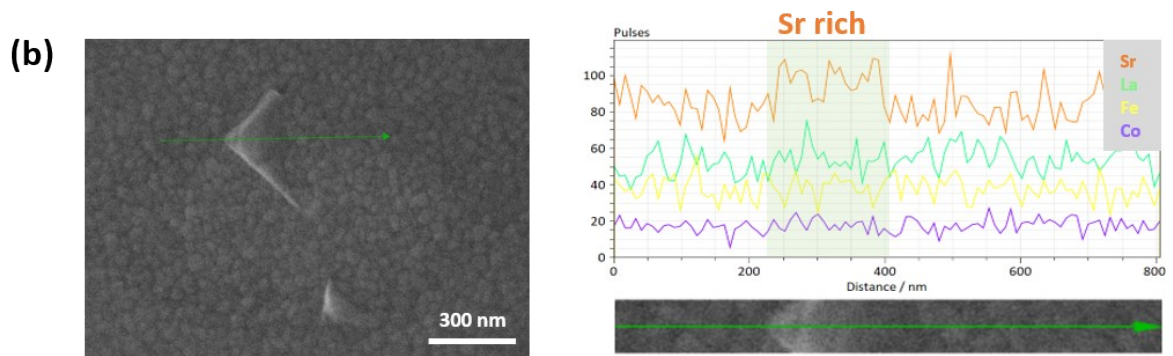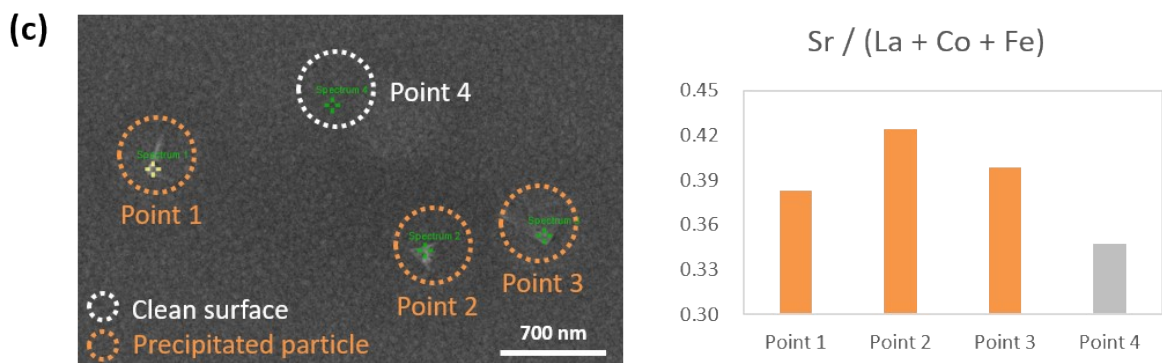

**Fig. S4** Scanning electron microscopy (SEM) analysis of bare  $\text{La}_{0.6}\text{Sr}_{0.4}\text{Co}_{0.2}\text{Fe}_{0.8}\text{O}_{3-\delta}$  (LSCF) thin films after heat treatment at 650 °C for 30 hours (a) energy-dispersive X-ray spectroscopy (EDS) elemental maps, (b) EDS line-scanning, and (c) EDS point analysis.

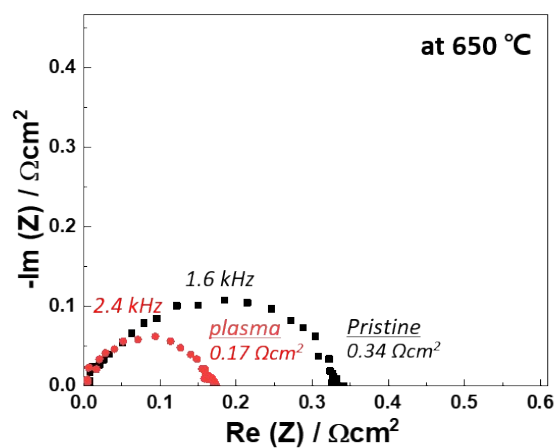

**Fig. S5** Nyquist plots of pristine and plasma-treated  $\text{La}_{0.6}\text{Sr}_{0.4}\text{Co}_{0.2}\text{Fe}_{0.8}\text{O}_{3-\delta}$  (LSCF) at 650 °C.



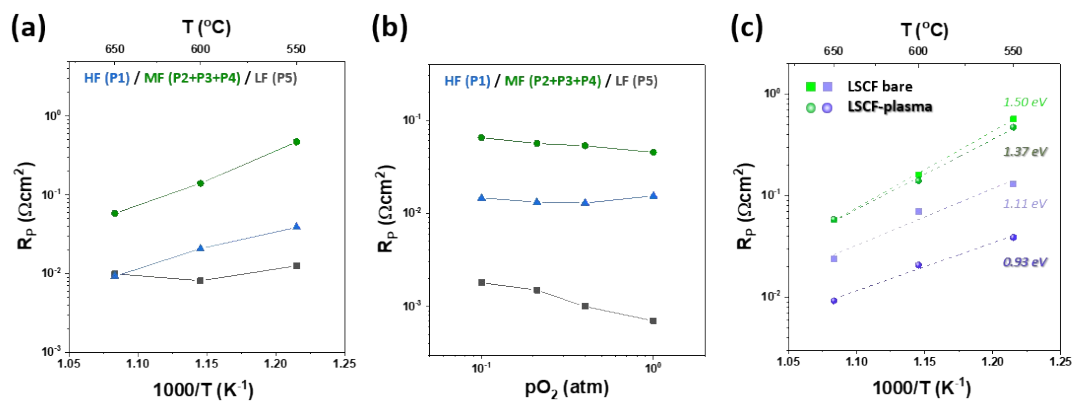

**Fig. S6** (a) Temperature and (b) oxygen partial pressure dependencies results of plasma treated LSCF in different frequency region and (c) comparison of activation energy of medium frequency (MF) and high frequency (HF) resistance for bare and plasma-treated  $\text{La}_{0.6}\text{Sr}_{0.4}\text{Co}_{0.2}\text{Fe}_{0.8}\text{O}_{3-\delta}$  (LSCF).

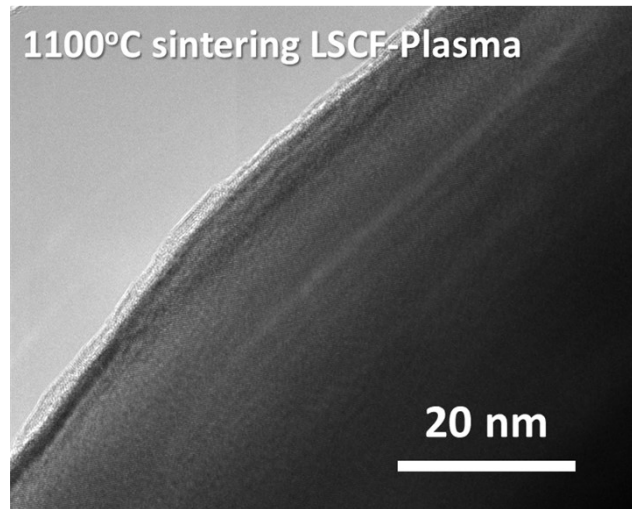

**Fig. S7.** HR-TEM image of 1100°C-sintered LSCF with plasma treatment
